# Supplementary material
Source: Springer Nature journal article supplement (https://www.springermedizin.de/resource/supplementary/12936_2010_1659_MOESM1_ESM.pdf/9542304)
Supplement: MOESM1 [file 9542304]

1037 women enrolled

-17 non pregnant women  
-38 withdrawals

982 women followed-up

$\geq 3$  ANVs attended :  
863 women

-4 maternal deaths  
-33 miscarriages (including 1 twin)  
-32 stillbirths (including 2 twins)  
-1 abortion for malformation

$\geq 5$  ANVs attended :  
538 women

-15 house removals  
-61 lost of follow-up: unstated reason

818 live singletons  
18 live twins
